# Supplementary material for: Development of novel thioether compound for spontaneous chiral crystallization
Source: Royal Society of Chemistry journal article supplement (doi:10.1039/b921416j), 2009-12-23
Supplement: b921416j.pdf [file b921416j.pdf]

## ELECTRONIC SUPPLEMENTARY INFORMATION

### Development of novel thioether compound for spontaneous chiral crystallization

Takafumi Kinuta,<sup>a</sup> Emi Yokoyama,<sup>a</sup> Tomohiro Sato,<sup>b</sup> Nobuo Tajima,<sup>c</sup> Reiko Kuroda,<sup>b,d,\*</sup> Yoshio Matsubara,<sup>a,\*</sup> and Yoshitane Imai<sup>a,\*</sup>

<sup>a</sup> *Department of Applied Chemistry, Faculty of Science and Engineering, Kinki University 3-4-1 Kowakae, Higashi-Osaka, Osaka 577-8502, Japan.*

<sup>b</sup> *JST ERATO-SORST Kuroda Chir morphology Team, 4-7-6, Komaba, Meguro-ku, Tokyo 153-0041, Japan.*

<sup>c</sup> *Graduate School of Pure and Applied Sciences, Tsukuba University, 1-1-1 Tenodai, Tsukuba, Ibaraki, 305-8571, Japan.*

<sup>d</sup> *Department of Life Sciences, Graduate School of Arts and Sciences, The University of Tokyo, 3-8-1 Komaba, Meguro-ku, Tokyo 153-8902, Japan.*

Correspondence to: [y-imai@apch.kindai.ac.jp](mailto:y-imai@apch.kindai.ac.jp), [c-kuroda@mail.ecc.u-tokyo.ac.jp](mailto:c-kuroda@mail.ecc.u-tokyo.ac.jp), [y-matsu@apch.kindai.ac.jp](mailto:y-matsu@apch.kindai.ac.jp)

Fig. ESI-1

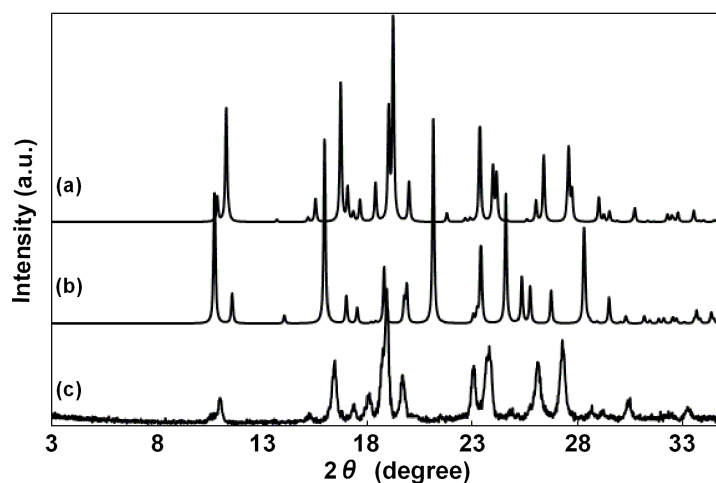

**Fig. ESI-1** (a) Simulated X-ray powder pattern of crystal **II A** calculated from crystal structure data. (b) Simulated X-ray powder pattern of crystal **II B** calculated from crystal structure data. (c) X-ray powder diffraction pattern of crystals **II**.

Fig. ESI-2

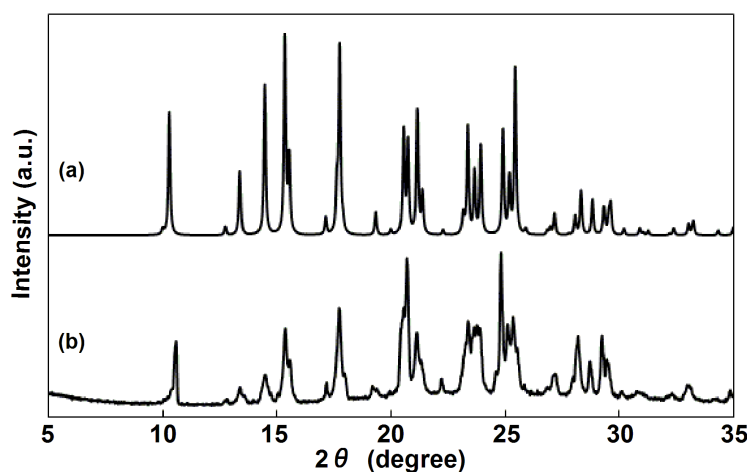

**Fig. ESI-2** (a) Simulated X-ray powder pattern of crystal **IV** calculated from crystal structure data. (b) X-ray powder diffraction pattern of crystals **IV**.

## 1. Experimental

### 1.1. General methods

Crystallization solvents were purchased from Wako Pure Chemical Industry. These solvents were used directly as obtained commercially. <sup>1</sup>H-NMR spectra were recorded with a Varian Mercury M300 spectrometer in chloroform-*d* using tetramethylsilane as an internal standard (300 MHz). Infrared spectra (IR) spectra were recorded with a SHIMADZU FTIR-8400 by using KBr pellets. Mass spectra were recorded with a JEOL-JMS700T.

### 1.2. Synthesis of compound 2

Compound **2** was synthesized following the method in literature for related compounds with some modification.<sup>1</sup> 2,3-Epoxy-3-methyl-1-cyclohexanone (0.8 g, 6.3 mmol) and 2-naphthalenethiol (1.0 g, 6.2 mmol) were solved to *iso*-propanol (80 mL). After that, 15% potassium hydroxide (0.1 mL) solution was added to *iso*-propanol solution. The reaction mixture was stirred at room temperature for 3h. A diethylether (200 mL) was added to reaction mixture. The combined organic layers were washed with brine, dried over Mg<sub>2</sub>SO<sub>4</sub>, and evaporated under vacuum to give the crude thioether compound. Compound **2** was isolated as a solid by silica gel column chromatography (AcOEt/Hexane: 1/5) in 94% yield. <sup>1</sup>H-NMR (300 MHz, CDCl<sub>3</sub>): δ 2.05-2.14 (m, 2H), 2.31 (s, 3H), 2.58-2.68 (m, 4H), 7.24-7.29 (m, 1H), 7.36-7.46 (m, 2H), 7.55 (d, *J* 1.8 Hz, 1H), 7.66-7.76 (m, 3H); IR (KBr): ν 1676, 1583, 848, 748 cm<sup>-1</sup>; EIMS: *m/z* = 268.

### 1.3. Synthesis of compound 3

2,3-Epoxy-2-methyl-1,4-naphthoquinone (60 mg, 0.3 mmol) and 2-quinolinethiol (50 mg, 0.3 mmol) were solved to *iso*-propanol (20 mL). After that, 15% potassium hydroxide (0.03 mL) solution was added to *iso*-propanol solution. The reaction mixture was stirred at room temperature for 3h. A diethylether (100 mL) was added to reaction mixture. The combined organic layers were washed with brine, dried over Mg<sub>2</sub>SO<sub>4</sub>, and evaporated under vacuum to give the crude thioether compound. Compound **3** was isolated as a solid by silica gel column chromatography (AcOEt/Hexane: 1/1) in 62% yield. <sup>1</sup>H-NMR (300 MHz, CDCl<sub>3</sub>): δ 2.46 (s, 3H), 7.37 (d, *J* 8.5 Hz, 1H), 7.44 (t, *J* 7.5 Hz, 1H), 7.58 (t, *J* 7.5 Hz, 1H),

7.68-7.79 (m, 4H), 8.02 (t,  $J$  8.5 Hz, 2H), 8.18 (d,  $J$  7.5 Hz, 1H); IR (KBr):  $\nu$  1658, 1589, 1280, 1137, 840, 748  $\text{cm}^{-1}$ ; EIMS:  $m/z$  = 331.

#### 1.4. Synthesis of compound 4

2,3-Epoxy-3-methyl-1-cyclohexanone (77 mg, 0.6 mmol) and 2-quinolinethiol (100 mg, 0.6 mmol) were solved to *iso*-propanol (150 mL). After that, 15% potassium hydroxide (0.05 mL) solution was added to *iso*-propanol solution. The reaction mixture was stirred at room temperature for 3h. A diethylether (250 mL) was added to reaction mixture. The combined organic layers were washed with brine, dried over  $\text{Mg}_2\text{SO}_4$ , and evaporated under vacuum to give the crude thioether compound. Compound 4 was isolated as a solid by silica gel column chromatography (AcOEt/Hexane: 1/5) in 82% yield.  $^1\text{H-NMR}$  (300 MHz,  $\text{CDCl}_3$ ):  $\delta$  2.11-2.20 (m, 2H), 2.28 (s, 3H), 2.66-2.72 (m, 4H), 7.17 (d,  $J$  7.7 Hz, 1H), 7.40 (t,  $J$  7.7 Hz, 1H), 7.60 (t,  $J$  7.8 Hz, 1H), 7.69 (d,  $J$  7.8 Hz, 1H), 7.81 (d,  $J$  8.6 Hz, 1H), 7.90 (d,  $J$  8.6 Hz, 1H); IR (KBr):  $\nu$  1676, 1593, 1421, 1087, 813, 756  $\text{cm}^{-1}$ ; EIMS:  $m/z$  = 269.

#### 1.5. X-ray crystallographic study of crystal

X-ray diffraction data for single crystals were collected using *BRUKER APEX*. The crystal structures were solved by the direct method<sup>2</sup> and refined by full-matrix least-squares using *SHELX97*.<sup>3</sup> The diagrams were prepared using *PLATON*.<sup>4</sup> Absorption corrections were performed using *SADABS*.<sup>5</sup> Nonhydrogen atoms were refined with anisotropic displacement parameters, and hydrogen atoms were included in the models in their calculated positions in the riding model approximation. **Crystallographic data for IIA:**  $\text{C}_{17}\text{H}_{16}\text{OS}$ ,  $M = 268.36$ , orthorhombic, space group  $P2_12_12_1$ ,  $a = 10.5932(8)$ ,  $b = 11.4042(8)$ ,  $c = 11.6692(9)$  Å,  $V = 1409.72(18)$  Å<sup>3</sup>,  $Z = 4$ ,  $D_c = 1.264$   $\text{gcm}^{-3}$ ,  $\mu(\text{Mo K}\alpha) = 0.218$   $\text{mm}^{-1}$ , 12420 reflections measured, 3285 unique, final  $R(F^2) = 0.0561$  using 2838 reflections with  $I > 2.0\sigma(I)$ ,  $R(\text{all data}) = 0.0636$ ,  $T = 298(2)\text{K}$ , *Flack param.* = -0.03(10), CCDC 749801. **Crystallographic data for IIB:**  $\text{C}_{17}\text{H}_{16}\text{OS}$ ,  $M = 268.36$ , Orthorhombic, space group  $P2_12_12_1$ ,  $a = 9.7552(6)$ ,  $b = 11.0921(7)$ ,  $c = 12.3352(8)$  Å,  $V = 1334.74(15)$  Å<sup>3</sup>,  $Z = 4$ ,  $D_c = 1.335$   $\text{gcm}^{-3}$ ,  $\mu(\text{Mo K}\alpha) = 0.231$   $\text{mm}^{-1}$ , 9720 reflections measured, 3305 unique, final  $R(F^2) = 0.0325$  using 3125 reflections with  $I > 2.0\sigma(I)$ ,  $R(\text{all data}) = 0.0342$ ,  $T = 125(2)$  K, *Flack param.* = 0.02(6), CCDC 749802. **Crystallographic data for III:**  $\text{C}_{20}\text{H}_{14}\text{O}_2\text{SN}$ ,  $M = 331.37$ , Triclinic, space group  $P-1$ ,  $a = 7.7637(6)$ ,  $b = 8.5895(6)$ ,  $c = 12.7850(9)$  Å,  $\alpha = 105.3860(10)$ ,  $\beta = 98.5840(10)$ ,  $\gamma = 105.8040(10)$  °,  $V = 768.07(10)$  Å<sup>3</sup>,  $Z = 2$ ,  $D_c = 1.433$   $\text{gcm}^{-3}$ ,  $\mu(\text{Mo K}\alpha) = 0.223$   $\text{mm}^{-1}$ ,

6801 reflections measured, 3434 unique, final  $R(F^2) = 0.0406$  using 3075 reflections with  $I > 2.0\sigma(I)$ ,  $R(\text{all data}) = 0.0452$ ,  $T = 115(2)$  K. CCDC 749803. **Crystallographic data for IV:**  $C_{16}H_{15}NOS$ ,  $M = 269.35$ , orthorhombic, space group  $P2_12_12_1$ ,  $a = 7.6159(5)$ ,  $b = 10.3651(7)$ ,  $c = 17.2948(12)$  Å,  $V = 1365.24(16)$  Å<sup>3</sup>,  $Z = 4$ ,  $D_c = 1.310$  gcm<sup>-3</sup>,  $\mu(\text{Mo K}\alpha) = 0.228$  mm<sup>-1</sup>, 10197 reflections measured, 3379 unique, final  $R(F^2) = 0.0303$  using 3143 reflections with  $I > 2.0\sigma(I)$ ,  $R(\text{all data}) = 0.0323$ ,  $T = 120(2)$  K, *Flack param.* =  $-0.07(5)$ , CCDC 749804. These data can be obtained free of charge via [www.ccdc.cam.ac.uk/conts/retrieving.html](http://www.ccdc.cam.ac.uk/conts/retrieving.html) (or from the Cambridge Crystallographic Data Centre, 12, Union Road, Cambridge CB21EZ, UK; fax: (+44)1223-336-033; [deposit@ccdc.cam.ac.uk](mailto:deposit@ccdc.cam.ac.uk)).

## References

1. (a) A. G. Schultz, D. S. Kashdan, *J. Org. Chem.*, 1973, **38**, 3185. (b) F. Fringuelli, F. Pizzo, L. Vaccaro, *J. Org. Chem.*, 2004, **69**, 2315.
2. G. M. Sheldrick, *SHELX97*. Program for the solution of crystal structures. University of Goettingen, Germany; 1997.
3. G. M. Sheldrick, *SHELX97*. Program for the refinement of crystal structures. University of Goettingen, Germany; 1997.
4. A. L. Spek, *PLATON*, Molecular geometry and graphics program. University of Utrecht, The Netherlands; 1999.
5. G. M. Sheldrick, *SADABS*, Program for Empirical Absorption Correction of Area Detector Data. University of Göttingen, Germany; 1996.
